# Supplementary material for: Meta-analysis of tumor- and T cell-intrinsic mechanisms of sensitization to checkpoint inhibition
Source: PubMed Central journal article supplement (PMC7933824; doi:10.1016/j.cell.2021.01.002), 2021-02-04
Supplement: mmc1.pdf [file mmc1.pdf]

## Supplemental Information

### **Meta-analysis of tumor- and T cell-intrinsic mechanisms of sensitization to checkpoint inhibition**

**Kevin Litchfield, James L. Reading, Clare Puttick, Krupa Thakkar, Chris Abbosh, Robert Bentham, Thomas B.K. Watkins, Rachel Rosenthal, Dhruva Biswas, Andrew Rowan, Emilia Lim, Maise Al Bakir, Virginia Turati, José Afonso Guerra-Assunção, Lucia Conde, Andrew J.S. Furness, Sunil Kumar Saini, Sine R. Hadrup, Javier Herrero, Se-Hoon Lee, Peter Van Loo, Tariq Enver, James Larkin, Matthew D. Hellmann, Samra Turajlic, Sergio A. Quezada, Nicholas McGranahan, and Charles Swanton**

| <b>AUC values by cohort by predictor:</b> | <b>TMB</b> | <b>multivariable (11 markers)</b> | <b>multivariable (2 markers: clonal TMB + CXCL9)</b> |
|-------------------------------------------|------------|-----------------------------------|------------------------------------------------------|
| Test_cohort_1 - "all other" tumour types  | 0.68       | 0.86                              | 0.79                                                 |
| Test_cohort_2 – melanoma                  | 0.58       | 0.66                              | 0.63                                                 |
| Test_cohort_3 - lung cancer               | 0.62       | 0.70                              | 0.716                                                |

**Table S2 – AUC test results for the TMB, full multivariable model, and two parameter models. Related to figure 3.**
